# Supplementary material for: The Prediction of Biological Features Using Magnetic Resonance Imaging in Head and Neck Squamous Cell Carcinoma: A Systematic Review and Meta-Analysis
Source: MDPI journal article supplement (doi:10.3390/cancers15205077), 2023-10-20
Supplement: s1 [file s1]

# Supplementary material S2

## Results

Table of content:

|                                                                                                                                    |                |
|------------------------------------------------------------------------------------------------------------------------------------|----------------|
| <b>Appendix S1 – Overall ‘Risk of Bias’ and ‘Applicability’ score per biological factor.....</b>                                   | <b>Page 2</b>  |
| <b>Appendix S2 – Individual ‘Risk of Bias’ and ‘Applicability’ score.....</b>                                                      | <b>Page 3</b>  |
| <b>Appendix S3 – Overview of proportion MRI parameter studies reporting significant associations with biological features.....</b> | <b>Page 4</b>  |
| A3.1 – Stand-alone conventional T1W and T2W imaging parameters.....                                                                | Page 10        |
| A3.2 – Diffusion parameters .....                                                                                                  | Page 4         |
| A3.2 – Perfusion parameters.....                                                                                                   | Page 7         |
| <b>Appendix S4 – Overview of proportion MRI parameter studies reporting significant associations with biological features.....</b> | <b>Page 12</b> |
| A4.1 – Stand-alone conventional T1W and T2W imaging parameters.....                                                                | Page 13        |
| A4.2 – Diffusion parameters .....                                                                                                  | Page 12        |
| A4.2 – Perfusion parameters.....                                                                                                   | Page 12        |

# APPENDIX S1 – OVERALL RISK OF BIAS AND APPLICABILITY SCORE PER BIOLOGICAL FACTOR

Figure A1.1 ‘Risk of Bias’ and ‘Applicability’ assessment sorted by biological factor. Values indicate the number of studies within the respective QUADAS-2 ‘risk of bias’ or ‘applicability’ class. Green or "low" indicates a low risk of bias in the study and/or low concern regarding applicability. Yellow or "unclear/medium" suggests either insufficient information provided or non-ideal study characteristics influencing applicability or risk of bias. Red or "high" signifies significant concerns regarding bias or applicability.

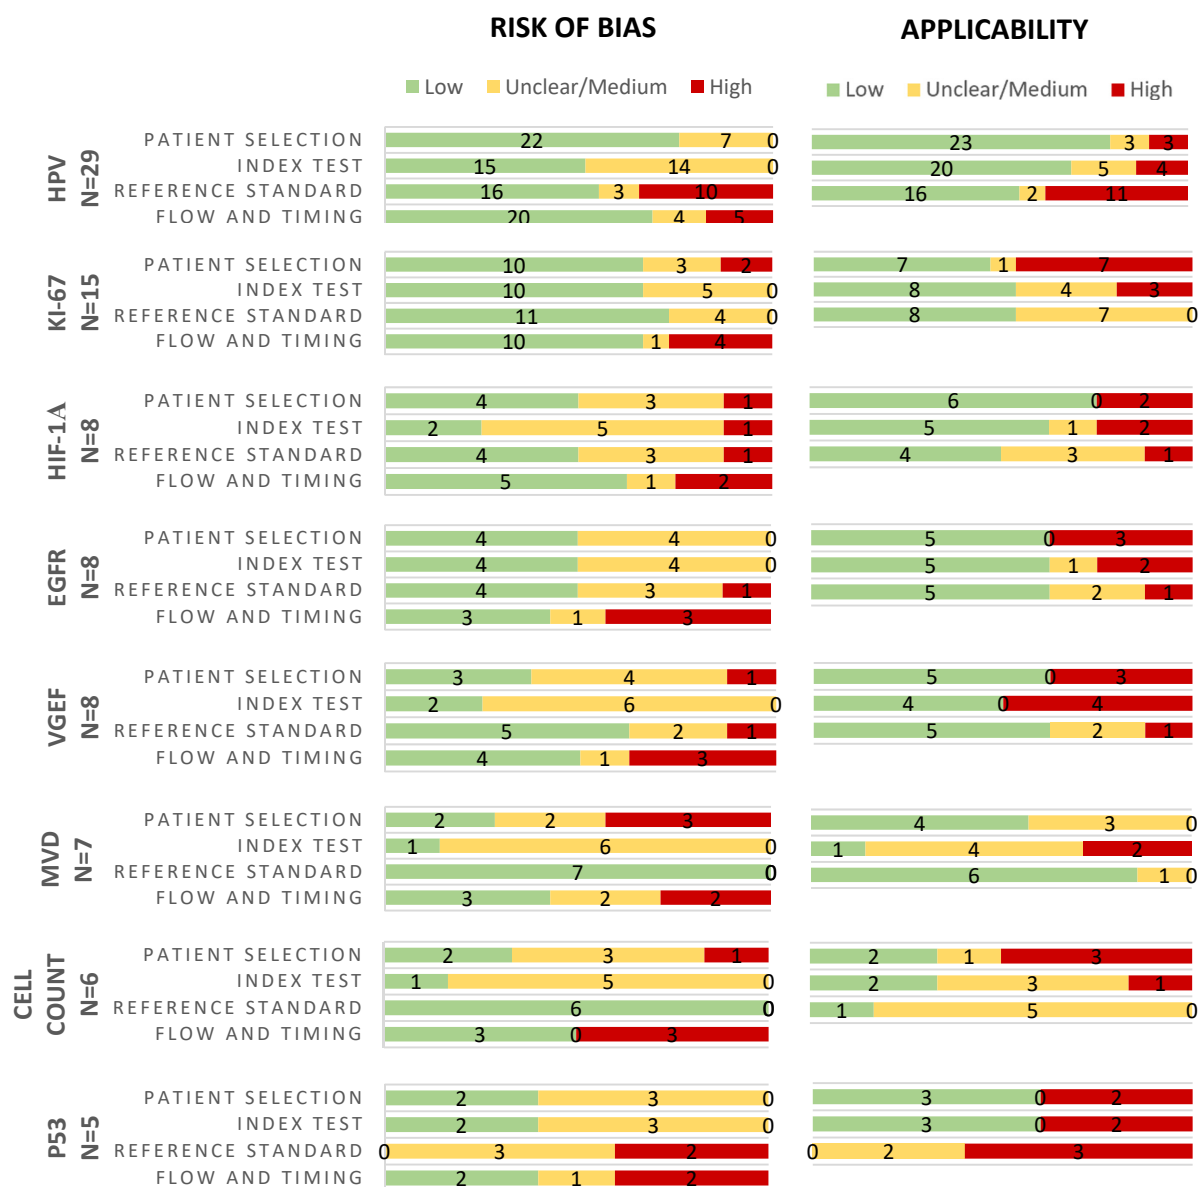

APPENDIX S2 – INDIVIDUAL QUADAS-2 ‘RISK OF BIAS’ AND ‘APPLICABILITY’ SCORES PER INCLUDED STUDY

Table A2.1 ‘Risk of Bias’ and ‘Applicability’ assessment for each independent study. Values indicate the numbers of studies within the respective QUADAS-2 ‘risk of bias’ or ‘applicability’ class. Green or "low" indicates a low risk of bias in the study and/or low concern regarding applicability. Yellow or "unclear/medium" suggests either insufficient information provided or non-ideal study characteristics influencing applicability or risk of bias. Red or "high" signifies significant concerns regarding bias or applicability.

| Author, year    | Biological factors                               | Risk of Bias      |            |                    |                 | Applicability     |            |                    |
|-----------------|--------------------------------------------------|-------------------|------------|--------------------|-----------------|-------------------|------------|--------------------|
|                 |                                                  | Patient Selection | Index test | Reference standard | Flow and timing | Patient selection | Index test | Reference standard |
| Ahn, 2021       | HPV                                              | Green             | Green      | Green              | Green           | Green             | Green      | Green              |
| Boot, 2023      | HPV                                              | Yellow            | Yellow     | Green              | Red             | Green             | Green      | Green              |
| Bos, 2021       | HPV                                              | Green             | Green      | Green              | Yellow          | Green             | Green      | Green              |
| Bos, 2022       | HPV                                              | Green             | Green      | Green              | Yellow          | Green             | Green      | Green              |
| Chan, 2016      | HPV                                              | Green             | Green      | Red                | Red             | Green             | Red        | Red                |
| Chen T., 2015   | HIF-1 $\alpha$                                   | Red               | Red        | Green              | Green           | Red               | Red        | Green              |
| Chen Y., 2023   | EGFR                                             | Green             | Yellow     | Green              | Green           | Green             | Yellow     | Green              |
| Choi, 2016      | HPV                                              | Green             | Yellow     | Red                | Green           | Green             | Green      | Red                |
| Dang, 2015      | P53                                              | Green             | Green      | Red                | Green           | Green             | Red        | Red                |
| De Perrot, 2017 | HPV                                              | Green             | Green      | Green              | Green           | Green             | Green      | Green              |
| Donaldson, 2015 | VGEF                                             | Green             | Yellow     | Green              | Green           | Green             | Green      | Green              |
| Driessen, 2016  | HPV                                              | Green             | Yellow     | Green              | Green           | Green             | Green      | Green              |
| Freihat, 2021   | HPV                                              | Green             | Green      | Red                | Green           | Green             | Red        | Red                |
| Gao, 2021       | Whole transcriptomic sequencing                  | Green             | Green      | Green              | Yellow          | Yellow            | Green      | Yellow             |
| Giannitto, 2020 | HPV                                              | Green             | Yellow     | Green              | Green           | Green             | Green      | Green              |
| Han, 2018       | HPV                                              | Green             | Green      | Green              | Green           | Green             | Green      | Green              |
| Hu, 2018        | HIF-1 $\alpha$ , VGEF, MVD (CD34)                | Green             | Yellow     | Green              | Green           | Green             | Red        | Green              |
| Huang, 2021     | HIF-1 $\alpha$ , EGFR, KI-67                     | Green             | Green      | Yellow             | Green           | Green             | Green      | Green              |
| Karabay, 2022   | MVD (CD34,CD105)                                 | Green             | Green      | Green              | Green           | Green             | Green      | Green              |
| Kawaguchi, 2020 | HPV                                              | Yellow            | Green      | Red                | Green           | Yellow            | Yellow     | Red                |
| Lenoir, 2022    | HPV                                              | Green             | Green      | Green              | Green           | Green             | Yellow     | Green              |
| Li, 2023        | HPV                                              | Yellow            | Green      | Red                | Green           | Green             | Green      | Red                |
| Liu, 2021       | HIF-1 $\alpha$                                   | Green             | Yellow     | Green              | Green           | Green             | Yellow     | Yellow             |
| Martens, 2019   | HPV                                              | Green             | Green      | Yellow             | Green           | Yellow            | Green      | Yellow             |
| Marzi, 2022     | HPV                                              | Green             | Yellow     | Green              | Red             | Green             | Yellow     | Green              |
| Meyer, 2018 (A) | HPV, P53, HIF-1 $\alpha$ , VGEF, EGFR            | Yellow            | Yellow     | Red                | Red             | Red               | Green      | Red                |
| Meyer, 2019 (B) | HPV, P53, HIF-1 $\alpha$ , VGEF, EGFR            | Yellow            | Yellow     | Red                | Yellow          | Green             | Green      | Red                |
| Meyer, 2019 (C) | HPV, P53, HIF-1 $\alpha$ , VGEF, EGFR, KI-67, CC | Yellow            | Yellow     | Red                | Red             | Red               | Green      | Red                |
| Meyer, 2019 (D) | MVD (CD105)                                      | Yellow            | Yellow     | Green              | Yellow          | Yellow            | Yellow     | Green              |
| Meyer, 2019 (E) | MVD (CD105)                                      | Yellow            | Yellow     | Green              | Yellow          | Yellow            | Yellow     | Green              |

|                           |                        |                                                                                     |                                                                                     |                                                                                     |                                                                                      |                                                                                       |                                                                                       |                                                                                       |
|---------------------------|------------------------|-------------------------------------------------------------------------------------|-------------------------------------------------------------------------------------|-------------------------------------------------------------------------------------|--------------------------------------------------------------------------------------|---------------------------------------------------------------------------------------|---------------------------------------------------------------------------------------|---------------------------------------------------------------------------------------|
| Nakahira, 2014            | HPV                    |    |    |    |    |    |    |    |
| Park, 2022                | HPV                    |    |    |    |    |    |    |    |
| Piludu, 2021              | HPV                    |    |    |    |    |    |    |    |
| Rasmussen, 2020           | VGEF, EGFR, KI-67, CC  |    |    |    |    |    |    |    |
| Rasmussen, 2020           | P53                    |    |    |    |    |    |    |    |
| Ravanelli, 2018           | HPV                    |    |    |    |    |    |    |    |
| Samolyk-Kogaczewska, 2020 | HPV, KI-67             |    |    |    |    |    |    |    |
| Schouten, 2015            | HPV                    |    |    |    |    |    |    |    |
| Shima, 2023               |                        |    |    |    |    |    |    |    |
| Sohn, 2020                | HPV                    |    |    |    |    |    |    |    |
| Suh, 2020                 | HPV                    |    |    |    |    |    |    |    |
| Surov, 2016 (A)           | KI-67, CC              |    |    |    |    |    |    |    |
| Surov, 2017 (B)           | KI-67, MVD (CD31), CC  |    |    |    |    |    |    |    |
| Surov, 2018 (C)           | KI-67, CC              |    |    |    |    |    |    |    |
| Surov, 2018 (D)           | KI-67, CC              |    |    |    |    |    |    |    |
| Swartz, 2018              | HIF-1 $\alpha$ , KI-67 |    |    |    |    |    |    |    |
| Tekiki, 2021              | VGEF, MVD (CD31)       |    |    |    |    |    |    |    |
| Tse, 2010                 | VGEF, EGFR             |    |    |    |    |    |    |    |
| Unestubo, 2009            | MVD (CD34)             |   |   |   |   |   |   |   |
| Vidiri, 2019              | HPV                    |  |  |  |  |  |  |  |
| Wong, 2016                | HPV                    |  |  |  |  |  |  |  |
| Wu W., 2021               | KI-67                  |  |  |  |  |  |  |  |
| Wu, Y. 2023               |                        |  |  |  |  |  |  |  |
| Zhang, 2020               | Genes panel sequencing |  |  |  |  |  |  |  |

APPENDIX S3 – OVERVIEW OF PROPORTION MRI PARAMETER STUDIES REPORTING SIGNIFICANT ASSOCIATIONS WITH BIOLOGICAL FEATURES.

Tables depicting the frequency of reported significant correlations between the stated biological factors and the individual MRI parameter out of the total number of correlations of the researching studies, displayed as  $\text{nr.Significant}^{\text{significant references}}/\text{nr.Total}^{\text{Other reporting references}}$ . If the percentage of significant correlations exceeds 50%, the corresponding numbers are presented in bold font. The tables are sorted by MRI sequence technique: (A3.1) Diffusion parameters (including all IVIM and DKI parameters), (A3.2) Perfusion parameters (including pharmacokinetic models, time-signal intensity curve (TIC), and arterial spin labeling (ASL) parameters), and (A3.3) stand-alone conventional t1w and t2w imaging parameters.

A3.1 STAND-ALONE CONVENTIONAL T1W AND T2W IMAGING PARAMETERS

|                   |         | Conventional T1W(+c), T2W, DWI or not specified |                   |                  |                   |                   |                  |                  |                  | DWI               | T1W               |                   | T2W              |                  |
|-------------------|---------|-------------------------------------------------|-------------------|------------------|-------------------|-------------------|------------------|------------------|------------------|-------------------|-------------------|-------------------|------------------|------------------|
| BIOLOGICAL FACTOR |         | Volume                                          | Diameter          |                  | Necrosis on MRI   |                   |                  |                  | SIR              | SIR               | HSL               | SIR               | LSL              |                  |
| HPV               | All     | 0/5 <sup>A,B,D,E*,F</sup>                       | 0/1 <sup>E*</sup> |                  | -                 |                   |                  |                  | 0/1 <sup>C</sup> | 0/1 <sup>C</sup>  | -                 | 0/1 <sup>C</sup>  | -                |                  |
|                   | P16     | 0/1 <sup>E</sup>                                | 0/1 <sup>E</sup>  |                  | -                 |                   |                  |                  | 0/1 <sup>C</sup> | 0/1 <sup>C</sup>  | -                 | 0/1 <sup>C</sup>  | -                |                  |
|                   | P16+PCR | 0/4 <sup>A,D,E,F</sup>                          | 0/1 <sup>E</sup>  |                  | -                 |                   |                  |                  | -                | -                 | -                 | -                 | -                |                  |
|                   | Other   | 0/1 <sup>B</sup>                                | -                 |                  | -                 |                   |                  |                  | -                | -                 | -                 | -                 | -                |                  |
| Ki-67             |         | 0/1 <sup>E</sup>                                | 0/1 <sup>E</sup>  |                  | -                 |                   |                  |                  | -                | -                 | 0/1 <sup>I</sup>  | -                 | 0/1 <sup>I</sup> |                  |
| HIF-1α            |         | -                                               | -                 |                  | 1/1 <sup>I</sup>  |                   |                  |                  | -                | -                 | -                 | -                 | -                |                  |
|                   |         | Conventional T1W(+c)                            |                   |                  |                   |                   |                  |                  |                  |                   |                   |                   |                  |                  |
|                   |         | Mean                                            | Min               | Max              | Median            | Mode              | SD               | Kurtosis         | Skewness         | Entropy           | P10               | P25               | P75              | P90              |
| HPV               | All     | 0/2 <sup>G,H</sup>                              | 0/1 <sup>G</sup>  | 0/1 <sup>G</sup> | 0/1 <sup>G</sup>  | 0/1 <sup>G</sup>  | 0/1 <sup>G</sup> | 0/1 <sup>G</sup> | 0/1 <sup>G</sup> | 0/1 <sup>G</sup>  | 0/1 <sup>G</sup>  | 0/1 <sup>G</sup>  | 0/1 <sup>G</sup> | 0/1 <sup>G</sup> |
|                   | P16     | 0/1 <sup>G</sup>                                | 0/1 <sup>G</sup>  | 0/1 <sup>G</sup> | 0/1 <sup>G</sup>  | 0/1 <sup>G</sup>  | 0/1 <sup>G</sup> | 0/1 <sup>G</sup> | 0/1 <sup>G</sup> | 0/1 <sup>G</sup>  | 0/1 <sup>G</sup>  | 0/1 <sup>G</sup>  | 0/1 <sup>G</sup> | 0/1 <sup>G</sup> |
|                   | Other   | 0/1 <sup>H</sup>                                | -                 | -                | -                 | -                 | 0/1 <sup>H</sup> | 1/1 <sup>H</sup> | 0/1 <sup>H</sup> | 0/1 <sup>H</sup>  | -                 | -                 | -                | -                |
| Ki-67             |         | 0/1 <sup>G</sup>                                | 0/1 <sup>G</sup>  | 0/1 <sup>G</sup> | 0/1 <sup>G</sup>  | 0/1 <sup>G</sup>  | 0/1 <sup>G</sup> | 0/1 <sup>G</sup> | 0/1 <sup>G</sup> | 0/1 <sup>G</sup>  | 0/1 <sup>G</sup>  | 0/1 <sup>G</sup>  | 0/1 <sup>G</sup> | 0/1 <sup>G</sup> |
| HIF-1α            |         | 0/1 <sup>G</sup>                                | 0/1 <sup>G</sup>  | 0/1 <sup>G</sup> | 0/1 <sup>G</sup>  | 0/1 <sup>G</sup>  | 0/1 <sup>G</sup> | 0/1 <sup>G</sup> | 0/1 <sup>G</sup> | 0/1 <sup>G</sup>  | 0/1 <sup>G</sup>  | 0/1 <sup>G</sup>  | 0/1 <sup>G</sup> | 0/1 <sup>G</sup> |
| EGFR              |         | 0/1 <sup>G</sup>                                | 0/1 <sup>G</sup>  | 0/1 <sup>G</sup> | 0/1 <sup>G</sup>  | 0/1 <sup>G</sup>  | 0/1 <sup>G</sup> | 0/1 <sup>G</sup> | 0/1 <sup>G</sup> | 0/1 <sup>G</sup>  | 0/1 <sup>G</sup>  | 0/1 <sup>G</sup>  | 0/1 <sup>G</sup> | 0/1 <sup>G</sup> |
| VGEF              |         | 0/1 <sup>G*</sup>                               | 0/1 <sup>G</sup>  | 0/1 <sup>G</sup> | 0/1 <sup>G*</sup> | 0/1 <sup>G*</sup> | 0/1 <sup>G</sup> | 0/1 <sup>G</sup> | 0/1 <sup>G</sup> | 0/1 <sup>G</sup>  | 1/1 <sup>G*</sup> | 0/1 <sup>G*</sup> | 0/1 <sup>G</sup> | 0/1 <sup>G</sup> |
| Tumor cell count  |         | 0/1 <sup>G</sup>                                | 0/1 <sup>G</sup>  | 0/1 <sup>G</sup> | 0/1 <sup>G</sup>  | 0/1 <sup>G</sup>  | 0/1 <sup>G</sup> | 0/1 <sup>G</sup> | 0/1 <sup>G</sup> | 0/1 <sup>G</sup>  | 0/1 <sup>G</sup>  | 0/1 <sup>G</sup>  | 0/1 <sup>G</sup> | 0/1 <sup>G</sup> |
| p53               |         | 0/1 <sup>G</sup>                                | 0/1 <sup>G</sup>  | 0/1 <sup>G</sup> | 0/1 <sup>G</sup>  | 0/1 <sup>G</sup>  | 0/1 <sup>G</sup> | 0/1 <sup>G</sup> | 0/1 <sup>G</sup> | 1/1 <sup>G*</sup> | 0/1 <sup>G</sup>  | 0/1 <sup>G</sup>  | 0/1 <sup>G</sup> | 0/1 <sup>G</sup> |
|                   |         | Conventional T2W                                |                   |                  |                   |                   |                  |                  |                  |                   |                   |                   |                  |                  |
|                   |         | Mean                                            | Min               | Max              | Median            | Mode              | SD               | Kurtosis         | Skewness         | Entropy           | P10               | P25               | P75              | P90              |
| HPV               | All     | 1 <sup>H</sup> /2 <sup>G</sup>                  | 0/1 <sup>G</sup>  | 0/1 <sup>G</sup> | 0/1 <sup>G</sup>  | 0/1 <sup>G</sup>  | 0/1 <sup>G</sup> | 0/1 <sup>G</sup> | 0/1 <sup>G</sup> | 0/1 <sup>G</sup>  | 0/1 <sup>G</sup>  | 0/1 <sup>G</sup>  | 0/1 <sup>G</sup> | 0/1 <sup>G</sup> |
|                   | P16     | 0/1 <sup>G</sup>                                | 0/1 <sup>G</sup>  | 0/1 <sup>G</sup> | 0/1 <sup>G</sup>  | 0/1 <sup>G</sup>  | 0/1 <sup>G</sup> | 0/1 <sup>G</sup> | 0/1 <sup>G</sup> | 0/1 <sup>G</sup>  | 0/1 <sup>G</sup>  | 0/1 <sup>G</sup>  | 0/1 <sup>G</sup> | 0/1 <sup>G</sup> |

|                  |       |                   |                  |                   |                   |                   |                   |                   |                  |                   |                   |                   |                   |                   |
|------------------|-------|-------------------|------------------|-------------------|-------------------|-------------------|-------------------|-------------------|------------------|-------------------|-------------------|-------------------|-------------------|-------------------|
|                  | Other | 1/1 <sup>H</sup>  | -                | -                 | -                 | -                 | 0/1 <sup>H</sup>  | 0/1 <sup>H</sup>  | 0/1 <sup>H</sup> | 0/1 <sup>H</sup>  | -                 | -                 | -                 | -                 |
| Ki-67            |       | 0/1 <sup>G*</sup> | 0/1 <sup>G</sup> | 0/1 <sup>G</sup>  | 0/1 <sup>G*</sup> | 0/1 <sup>G*</sup> | 0/1 <sup>G</sup>  | 0/1 <sup>G</sup>  | 0/1 <sup>G</sup> | 0/1 <sup>G</sup>  | 0/1 <sup>G</sup>  | 0/1 <sup>G</sup>  | 0/1 <sup>G*</sup> | 0/1 <sup>G*</sup> |
| HIF-1α           |       | 0/1 <sup>G</sup>  | 0/1 <sup>G</sup> | 0/1 <sup>G</sup>  | 0/1 <sup>G</sup>  | 0/1 <sup>G</sup>  | 0/1 <sup>G</sup>  | 0/1 <sup>G</sup>  | 0/1 <sup>G</sup> | 0/1 <sup>G</sup>  | 0/1 <sup>G†</sup> | 0/1 <sup>G</sup>  | 0/1 <sup>G</sup>  | 0/1 <sup>G†</sup> |
| EGFR             |       | 0/1 <sup>G</sup>  | 0/1 <sup>G</sup> | 0/1 <sup>G</sup>  | 0/1 <sup>G</sup>  | 0/1 <sup>G</sup>  | 0/1 <sup>G</sup>  | 0/1 <sup>G</sup>  | 0/1 <sup>G</sup> | 0/1 <sup>G</sup>  | 0/1 <sup>G</sup>  | 0/1 <sup>G</sup>  | 0/1 <sup>G</sup>  | 0/1 <sup>G</sup>  |
| VGEF             |       | 0/1 <sup>G</sup>  | 0/1 <sup>G</sup> | 0/1 <sup>G</sup>  | 0/1 <sup>G</sup>  | 0/1 <sup>G</sup>  | 0/1 <sup>G</sup>  | 0/1 <sup>G</sup>  | 0/1 <sup>G</sup> | 0/1 <sup>G*</sup> | 0/1 <sup>G</sup>  | 0/1 <sup>G</sup>  | 0/1 <sup>G</sup>  | 0/1 <sup>G</sup>  |
| Tumor cell count |       | 0/1 <sup>G</sup>  | 0/1 <sup>G</sup> | 0/1 <sup>G</sup>  | 0/1 <sup>G</sup>  | 0/1 <sup>G</sup>  | 0/1 <sup>G</sup>  | 0/1 <sup>G*</sup> | 0/1 <sup>G</sup> | 0/1 <sup>G</sup>  | 0/1 <sup>G</sup>  | 0/1 <sup>G</sup>  | 0/1 <sup>G</sup>  | 0/1 <sup>G</sup>  |
| p53              |       | 0/1 <sup>G*</sup> | 0/1 <sup>G</sup> | 0/1 <sup>G†</sup> | 0/1 <sup>G*</sup> | 0/1 <sup>G*</sup> | 0/1 <sup>G†</sup> | 0/1 <sup>G</sup>  | 0/1 <sup>G</sup> | 0/1 <sup>G</sup>  | 0/1 <sup>G</sup>  | 0/1 <sup>G*</sup> | 0/1 <sup>G*</sup> | 0/1 <sup>G†</sup> |

Table shows the proportion of studies (number significant / number not significant) reporting significant associations between different functional MRI parameters and biological features as indicated. Proportions of more than half testing the indicated association are highlighted in bold.

Abbreviations = Min: minimum; max: maximum; SD: Standard deviation; P10,P25,P75,P90: percentile 10, 25, 75, 90; SIR: signal intensity ratio; HSL: High signal lesion; LSL: low signal lesion; SD: standard deviation; P10/25/75/90: percentile

Note: \*Significant for P16 positive subgroup analyses; †significant in P16 negative subgroup analyses; \*Volume defined by CT or PET/MRI

- a. Driessen, 2016 (article reference: [35])
- b. Han, 2018 (article reference: [38])
- c. Kawaguchi, 2020 (article reference: [43])
- d. Martens, 2019 (article reference: [45])
- e. Samolyk-Kogaczewska, 2020 (article reference: [56])
- f. Vidiri, 2019 (article reference: [69])
- g. Meyer, 2019 (article reference: [49])
- h. Ravanelli, 2018 (article reference: [55])
- i. Chen T., 2015 (article reference: [31])

### A3.2 DIFFUSION PARAMETERS

|                   |         | Apparent diffusion coefficient (ADC) (10 <sup>-3</sup> mm <sup>2</sup> /s) |                                             |                                      |                                |                        |                                |                                      |                                      |                  |                        |                                |                                |                        |
|-------------------|---------|----------------------------------------------------------------------------|---------------------------------------------|--------------------------------------|--------------------------------|------------------------|--------------------------------|--------------------------------------|--------------------------------------|------------------|------------------------|--------------------------------|--------------------------------|------------------------|
| Biological factor |         | Mean                                                                       | Min                                         | Max                                  | Median                         | Mode                   | SD                             | Kurtosis                             | Skewness                             | Entropy          | P10                    | P25                            | P75                            | P90                    |
| HPV               | All     | <b>10<sup>A-D,G,H,I,J-L,N</sup></b><br><b>/15<sup>E,F,I,M,O</sup></b>      | 3 <sup>F,H,J</sup><br>/7 <sup>B,E,I,M</sup> | <b>2<sup>B,H</sup>/3<sup>I</sup></b> | 1 <sup>B</sup> /2 <sup>I</sup> | 0/1 <sup>I</sup>       | 1 <sup>H</sup> /2 <sup>L</sup> | 2 <sup>B,G</sup> /5 <sup>H,I,L</sup> | 2 <sup>B,G</sup> /5 <sup>H,I,L</sup> | 0/2 <sup>L</sup> | 0/1 <sup>I</sup>       | 1 <sup>B</sup> /2 <sup>I</sup> | 1 <sup>B</sup> /2 <sup>I</sup> | 0/1 <sup>I</sup>       |
|                   | P16     | <b>3<sup>A,D,J</sup>/5<sup>F,I</sup></b>                                   | <b>2<sup>F,J</sup>/3<sup>I</sup></b>        | 0/1 <sup>I</sup>                     | 0/1 <sup>I</sup>               | 0/1 <sup>I</sup>       | -                              | 0/1 <sup>I</sup>                     | 0/1 <sup>I</sup>                     | 0/1 <sup>I</sup> | 0/1 <sup>I</sup>       | 0/1 <sup>I</sup>               | 0/1 <sup>I</sup>               | 0/1 <sup>I</sup>       |
|                   | PCR+P16 | <b>6<sup>B,C,G,H,K,N</sup>/7<sup>M</sup></b>                               | 1 <sup>H</sup> /3 <sup>B,M</sup>            | <b>2/2<sup>B,H</sup></b>             | <b>1/1<sup>B</sup></b>         | -                      | <b>1/1<sup>H</sup></b>         | <b>2<sup>B,G</sup>/3<sup>H</sup></b> | <b>2<sup>B,G</sup>/3<sup>H</sup></b> | -                | -                      | <b>1/1<sup>B</sup></b>         | <b>1/1<sup>B</sup></b>         | -                      |
|                   | Other   | 1 <sup>L</sup> /3 <sup>E,O</sup>                                           | 0/1 <sup>E</sup>                            | -                                    | -                              | -                      | 0/1 <sup>L</sup>               | 0/1 <sup>L</sup>                     | 0/1 <sup>L</sup>                     | 0/1 <sup>L</sup> | -                      | -                              | -                              | -                      |
| Ki-67             |         | <b>5<sup>A-T,X</sup>/6<sup>U</sup></b>                                     | 1 <sup>S</sup> /3 <sup>R,U</sup>            | 2 <sup>R,S</sup> /2                  | <b>1/1<sup>S</sup></b>         | <b>1/1<sup>S</sup></b> | 0/1 <sup>S</sup>               | 0/1 <sup>S</sup>                     | 0/1 <sup>S</sup>                     | 0/1 <sup>S</sup> | <b>1/1<sup>S</sup></b> | <b>1/1<sup>S</sup></b>         | <b>1/1<sup>S</sup></b>         | <b>1/1<sup>S</sup></b> |
| HIF-1α            |         | 0/2 <sup>T,I</sup>                                                         | 0/1 <sup>I</sup>                            | 0/1 <sup>I</sup>                     | 0/1 <sup>I</sup>               | 0/1 <sup>I</sup>       | 0/1 <sup>I</sup>               | 0/1 <sup>I</sup>                     | 0/1 <sup>I</sup>                     | 0/1 <sup>*</sup> | 0/1 <sup>I</sup>       | 0/1 <sup>*</sup>               | 0/1 <sup>I</sup>               | 0/1 <sup>*</sup>       |
| EGFR              |         | 0/4 <sup>Q,I,V,Z</sup>                                                     | 0/1 <sup>I</sup>                            | 0/1 <sup>I</sup>                     | 0/1 <sup>I</sup>               | 0/1 <sup>I</sup>       | 0/1 <sup>I</sup>               | 0/1 <sup>I</sup>                     | 0/1 <sup>I</sup>                     | 0/1 <sup>I</sup> | 0/1 <sup>I</sup>       | 0/1 <sup>I</sup>               | 0/1 <sup>I</sup>               | 0/1 <sup>I</sup>       |
| VGEF              |         | 0/2 <sup>Q,I</sup>                                                         | 0/1 <sup>I</sup>                            | 0/1 <sup>I</sup>                     | 0/1 <sup>I</sup>               | 0/1 <sup>†</sup>       | 0/1 <sup>I</sup>               | 0/1 <sup>I</sup>                     | 0/1 <sup>I</sup>                     | 0/1 <sup>I</sup> | 0/1 <sup>I</sup>       | 0/1 <sup>I</sup>               | 0/1 <sup>I</sup>               | 0/1 <sup>I</sup>       |

|                  |         |                                                                            |                                |                        |                                                                               |                        |                        |                        |                        |                  |                        |                        |                        |                        |
|------------------|---------|----------------------------------------------------------------------------|--------------------------------|------------------------|-------------------------------------------------------------------------------|------------------------|------------------------|------------------------|------------------------|------------------|------------------------|------------------------|------------------------|------------------------|
| MVD              | All     | 0/1 <sup>w</sup>                                                           | 0/1 <sup>w</sup>               | 0/1 <sup>w</sup>       | 0/1 <sup>w</sup>                                                              | 0/1 <sup>w</sup>       | 0/1 <sup>w</sup>       | 0/1 <sup>w</sup>       | 0/1 <sup>w</sup>       | 0/1 <sup>w</sup> | 0/1 <sup>w</sup>       | 0/1 <sup>w</sup>       | 0/1 <sup>w</sup>       | 0/1 <sup>w</sup>       |
|                  | CD105   | 0/1 <sup>w</sup>                                                           | 0/1 <sup>w</sup>               | 0/1 <sup>w</sup>       | 0/1 <sup>w</sup>                                                              | 0/1 <sup>w</sup>       | 0/1 <sup>w</sup>       | 0/1 <sup>w</sup>       | 0/1 <sup>w</sup>       | 0/1 <sup>w</sup> | 0/1 <sup>w</sup>       | 0/1 <sup>w</sup>       | 0/1 <sup>w</sup>       | 0/1 <sup>w</sup>       |
| Tumor cell count |         | 1 <sup>s</sup> /3 <sup>Q,R</sup>                                           | 1 <sup>s</sup> /2 <sup>R</sup> | 0/2 <sup>R,S</sup>     | <b>1/1<sup>s</sup></b>                                                        | <b>1/1<sup>s</sup></b> | 0/1 <sup>s</sup>       | <b>1/1<sup>s</sup></b> | 0/1 <sup>s</sup>       | 0/1 <sup>s</sup> | <b>1/1<sup>s</sup></b> | <b>1/1<sup>s</sup></b> | <b>1/1<sup>s</sup></b> | <b>1/1<sup>s</sup></b> |
| p53              |         | 1 <sup>Q</sup> /2 <sup>I</sup>                                             | 0/1 <sup>I</sup>               | <b>1/1<sup>t</sup></b> | 0/1 <sup>I</sup>                                                              | 0/1 <sup>I</sup>       | 0/1 <sup>I</sup>       | 0/1 <sup>I*</sup>      | 0/1 <sup>I</sup>       | 0/1 <sup>I</sup> | 0/1 <sup>I</sup>       | 0/1 <sup>I</sup>       | 0/1 <sup>I†</sup>      | 0/1 <sup>I†</sup>      |
|                  |         | <b>ADC (10<sup>-3</sup> mm<sup>2</sup>/s)</b>                              |                                |                        | <b>Intravoxel incoherent motion (IVIM) (10<sup>-3</sup> mm<sup>2</sup>/s)</b> |                        |                        |                        |                        |                  |                        |                        |                        |                        |
|                  |         | IQR                                                                        | P10-P90                        | GTV                    | D <sub>t</sub>                                                                | f(%)                   | D*                     | D* x f                 | D <sub>t</sub> min     | D* min           | f min                  | D <sub>t</sub> max     | D* max                 | f max                  |
| HPV              | All     | <b>1/1<sup>B</sup></b>                                                     | <b>1/1<sup>H</sup></b>         | 0/1 <sup>H</sup>       | <b>3/3<sup>K,N,P</sup></b>                                                    | 0/1 <sup>N</sup>       | 0/1 <sup>N</sup>       | 0/1 <sup>N</sup>       | -                      | -                | -                      | -                      | -                      | -                      |
|                  | PCR+P16 | <b>1/1<sup>B</sup></b>                                                     | <b>1/1<sup>H</sup></b>         | 0/1 <sup>H</sup>       | <b>3/3<sup>K,N,P</sup></b>                                                    | 0/1 <sup>N</sup>       | 0/1 <sup>N</sup>       | 0/1 <sup>N</sup>       | -                      | -                | -                      | -                      | -                      | -                      |
| Ki-67            |         | -                                                                          | -                              | -                      | 0/1 <sup>U</sup>                                                              | 0/1 <sup>U</sup>       | 0/1 <sup>U</sup>       | -                      | 0/1 <sup>U</sup>       | 0/1 <sup>U</sup> | 0/1 <sup>U</sup>       | -                      | -                      | -                      |
|                  |         | <b>Diffusion Kurtosis imaging (DKI) (10<sup>-3</sup> mm<sup>2</sup>/s)</b> |                                |                        |                                                                               |                        |                        |                        |                        |                  |                        |                        |                        |                        |
|                  |         | K                                                                          | D <sub>K</sub>                 | DDC                    | α                                                                             | D <sub>slow</sub>      | MK                     | Ka                     | Kr                     | FAk              | MD                     | Da                     | Dr                     | FA                     |
| Ki-67            |         | <b>1/1<sup>X</sup></b>                                                     | <b>1/1<sup>X</sup></b>         | <b>1/1<sup>X</sup></b> | 0/1 <sup>X</sup>                                                              | <b>1/1<sup>X</sup></b> | <b>1/1<sup>Y</sup></b> | <b>1/1<sup>Y</sup></b> | <b>1/1<sup>Y</sup></b> | 0/1 <sup>Y</sup> | <b>1/1<sup>Y</sup></b> | <b>1/1<sup>Y</sup></b> | <b>1/1<sup>Y</sup></b> | 0/1 <sup>Y</sup>       |

Table shows the proportion of studies (number significant / number not significant) reporting significant associations between different functional MRI parameters and biological features as indicated. Proportions of more than half testing the indicated association are highlighted in bold.

Abbreviations: Min: minimum; max: maximum; SD: Standard deviation; P10,P25,P75,P90: percentile 10, 25, 75, 90; IQR: interquartile range; P10-P90: ADC between percentile 10 and 90; GTV: gross tumor volume; D<sub>t</sub>: tissue diffusion coefficient; f: perfusion fraction; D\*: perfusion related diffusion coefficient; K: kurtosis value; D<sub>K</sub>: the kurtosis-corrected diffusion coefficient; DDC: distributed diffusion coefficient; α: diffusion heterogeneity, D<sub>slow</sub>: slow diffusion coefficient; MK: mean kurtosis; Ka: axial kurtosis; Kr: radial kurtosis; FAk: fractional anisotropy of kurtosis; MD: mean diffusivity; DA: axial diffusivity; Dr: radial diffusivity; FA: fractional anisotropy

Notes: \*Significant for P16 positive subgroup analyses; †significant in P16 negative subgroup analyses

- |                                              |                                              |
|----------------------------------------------|----------------------------------------------|
| a. Chan, 2016 (article reference: [29])      | j. Nakahira, 2014 (article reference: [52])  |
| b. De Perrot, 2017 (article reference: [34]) | k. Piludu, 2021 (article reference: [54])    |
| c. Driessen, 2016 (article reference: [35])  | l. Ravanelli, 2018 (article reference: [55]) |
| d. Freihat, 2021 (article reference: [36])   | m. Schouten, 2015 (article reference: [57])  |
| e. Han, 2018 (article reference: [38])       | n. Vidiri, 2019 (article reference: [69])    |
| f. Kawaguchi, 2020 (article reference: [43]) | o. Wong, 2016 (article reference: [70])      |
| g. Lenoir, 2022 (article reference: [44])    | p. Marzi, 2022 (article reference: [46])     |
| h. Martens, 2019 (article reference: [45])   | q. Rasmussen, 2020 (article reference: [60]) |
| i. Meyer, 2018 (article reference: [47])     | r. Surov, 2016 (article reference: [61])     |

- s. Surov, 2018 (article reference: [63])
- t. Swartz, 2018 (article reference: [65])
- u. Wu W., 2021 (article reference: [71])
- v. Tse, 2010 (article reference: [67])

- w. Meyer, 2019 (article reference: [51])
- x. Shima, 2023 (article reference: [72])
- y. Wu Y., 2023 (article reference: [73])
- z. Chen Y., 2023 (article reference: [75])

### A3.2 PERFUSION PARAMETERS

|                   |         | Volume transfer constant ( $K^{trans}$ ) |         |            |             |            |         |             |             |            |         |             |             |         |
|-------------------|---------|------------------------------------------|---------|------------|-------------|------------|---------|-------------|-------------|------------|---------|-------------|-------------|---------|
| Biological factor |         | Mean                                     | Min     | Max        | Median      | Mode       | SD      | Kurtosis    | Skewness    | Entropy    | P10     | P25         | P75         | P90     |
| HPV               | All     | $1^B/4^{C-E}$                            | $0/1^D$ | $0/1^D$    | $1^B/2^D$   | $0/1^D$    | $0/1^D$ | $0/2^{B,D}$ | $0/2^{B,D}$ | $0/1^D$    | $0/1^D$ | $1^B/2^D$   | $1^B/2^D$   | $0/1^D$ |
|                   | P16     | $1^B/2^D$                                | $0/1^D$ | $0/1^D$    | $1^B/2^D$   | $0/1^D$    | $0/1^D$ | $0/2^{B,D}$ | $0/2^{B,D}$ | $0/1^D$    | $0/1^D$ | $1^B/2^D$   | $1^B/2^D$   | $0/1^D$ |
|                   | PCR+P16 | $0/1^E$                                  | -       | -          | -           | -          | -       | -           | -           | -          | -       | -           | -           | -       |
|                   | Other   | $0/1^C$                                  | -       | -          | -           | -          | -       | -           | -           | -          | -       | -           | -           | -       |
| Ki-67             |         | $1^I/4^{F,H,J}$                          | $1/1^I$ | $0/1^I$    | $0/1^I$     | $0/1^I$    | $0/1^I$ | $0/1^I$     | $1/1^I$     | $0/1^I$    | $1/1^I$ | $0/1^I$     | $0/1^I$     | $0/1^I$ |
| HIF-1 $\alpha$    |         | $0/3^{D,F,K}$                            | $0/1^D$ | $0/1^D$    | $0/1^D$     | $0/1^D$    | $0/1^D$ | $0/1^{D*}$  | $0/1^D$     | $0/1^D$    | $0/1^D$ | $0/1^D$     | $0/1^D$     | $0/1^D$ |
| EGFR              |         | $2^{B,F}/5^{D,H,Q}$                      | $0/1^D$ | $0/1^D$    | $0/2^{B,D}$ | $0/1^D$    | $0/1^D$ | $0/2^{B,D}$ | $0/2^{B,D}$ | $0/1^{D*}$ | $0/1^D$ | $0/2^{B,D}$ | $0/2^{B,D}$ | $0/1^D$ |
| VGEF              |         | $0/3^{D,H,K}$                            | $0/1^D$ | $0/1^{D*}$ | $0/1^D$     | $0/1^D$    | $0/1^D$ | $0/1^D$     | $0/1^D$     | $0/1^D$    | $0/1^D$ | $0/1^D$     | $0/1^D$     | $0/1^D$ |
| MVD               | All     | $1^{G*}/4^{I,K,O}$                       | $0/1^O$ | $0/1^O$    | $0/1^O$     | $0/1^O$    | $0/1^O$ | $0/1^O$     | $0/1^O$     | $0/1^O$    | $0/1^O$ | $0/1^O$     | $0/1^O$     | $0/1^O$ |
|                   | CD31    | $0/1^I$                                  | -       | -          | -           | -          | -       | -           | -           | -          | -       | -           | -           | -       |
|                   | CD34    | $1^{G*}/2^K$                             | -       | -          | -           | -          | -       | -           | -           | -          | -       | -           | -           | -       |
|                   | CD105   | $0/2^{G*,O}$                             | $0/1^O$ | $0/1^O$    | $0/1^O$     | $0/1^O$    | $0/1^O$ | $0/1^O$     | $0/1^O$     | $0/1^O$    | $0/1^O$ | $0/1^O$     | $0/1^O$     | $0/1^O$ |
| Tumor cell count  |         | $0/3^{H,I,J}$                            | $0/1^I$ | $0/1^I$    | $0/1^I$     | $0/1^I$    | $0/1^I$ | $1/1^I$     | $0/1^I$     | $0/1^I$    | $0/1^I$ | $0/1^I$     | $0/1^I$     | $0/1^I$ |
| p53               |         | $1^H/2^D$                                | $0/1^D$ | $0/1^D$    | $0/1^D$     | $0/1^D$    | $0/1^D$ | $0/1^D$     | $0/1^D$     | $0/1^D$    | $0/1^D$ | $0/1^D$     | $0/1^D$     | $0/1^D$ |
|                   |         | Rate constant ( $K_{ep}$ )               |         |            |             |            |         |             |             |            |         |             |             |         |
| Biological factor |         | Mean                                     | Min     | Max        | Median      | Mode       | SD      | Kurtosis    | Skewness    | Entropy    | P10     | P25         | P75         | P90     |
| HPV               | All     | $0/4^{B-E}$                              | $0/1^D$ | $0/1^D$    | $0/2^{B,D}$ | $0/1^D$    | $0/1^D$ | $1^D/2^B$   | $0/2^{B,D}$ | $0/1^D$    | $0/1^D$ | $1^B/2^D$   | $0/2^{B,D}$ | $0/1^D$ |
|                   | P16     | $0/2^{B,D}$                              | $0/1^D$ | $0/1^D$    | $0/2^{B,D}$ | $0/1^D$    | $0/1^D$ | $1^D/2^B$   | $0/2^{B,D}$ | $0/1^D$    | $0/1^D$ | $1^B/2^D$   | $0/2^{B,D}$ | $0/1^D$ |
|                   | PCR+P16 | $0/1^E$                                  | -       | -          | -           | -          | -       | -           | -           | -          | -       | -           | -           | -       |
|                   | Other   | $0/1^C$                                  | -       | -          | -           | -          | -       | -           | -           | -          | -       | -           | -           | -       |
| Ki-67             |         | $0/3^{F,I,J}$                            | $0/1^I$ | $0/1^I$    | $0/1^I$     | $0/1^I$    | $0/1^I$ | $0/1^I$     | $0/1^I$     | $1/1^I$    | $0/1^I$ | $0/1^I$     | $0/1^I$     | $0/1^I$ |
| HIF-1 $\alpha$    |         | $0/3^{D,F,K}$                            | $0/1^D$ | $0/1^D$    | $0/1^D$     | $0/1^D$    | $0/1^D$ | $0/1^D$     | $0/1^D$     | $0/1^{D*}$ | $0/1^D$ | $0/1^D$     | $0/1^D$     | $0/1^D$ |
| EGFR              |         | $1^B/4^{D,F,Q}$                          | $0/1^D$ | $0/1^D$    | $1^B/2^D$   | $0/1^D$    | $0/1^D$ | $0/2^{B,D}$ | $0/2^{B,D}$ | $1/1^D$    | $0/1^D$ | $1^B/2^D$   | $1^B/2^D$   | $0/1^D$ |
| VGEF              |         | $1/2^{D,K}$                              | $0/1^D$ | $0/1^D$    | $0/1^D$     | $0/1^{D*}$ | $0/1^D$ | $0/1^D$     | $0/1^D$     | $0/1^D$    | $0/1^D$ | $0/1^D$     | $0/1^D$     | $0/1^D$ |



|                                                                   |         |                                     |                        |                   |                        |                        |                  |                        |                        |                        |                        |                        |                        |                     |
|-------------------------------------------------------------------|---------|-------------------------------------|------------------------|-------------------|------------------------|------------------------|------------------|------------------------|------------------------|------------------------|------------------------|------------------------|------------------------|---------------------|
| MVD                                                               | All     | 1 <sup>0</sup> /4 <sup>G*,i,k</sup> | 0/1 <sup>0</sup>       | 0/1 <sup>0</sup>  | 0/1 <sup>0</sup>       | <b>1/1<sup>0</sup></b> | 0/1 <sup>0</sup> | 0/1 <sup>0</sup>       | 0/1 <sup>0</sup>       | 0/1 <sup>0</sup>       | <b>1/1<sup>0</sup></b> | <b>1/1<sup>0</sup></b> | <b>1/1<sup>0</sup></b> | 0/1 <sup>0</sup>    |
|                                                                   | CD31    | 0/1 <sup>I</sup>                    | -                      | -                 | -                      | -                      | -                | -                      | -                      | -                      | -                      | -                      | -                      | -                   |
|                                                                   | CD34    | 0/2 <sup>G*,k</sup>                 | -                      | -                 | -                      | -                      | -                | -                      | -                      | -                      | -                      | -                      | -                      | -                   |
|                                                                   | CD105   | 1 <sup>0</sup> /2 <sup>G*</sup>     | 0/1 <sup>0</sup>       | 0/1 <sup>0</sup>  | 0/1 <sup>0</sup>       | <b>1/1<sup>0</sup></b> | 0/1 <sup>0</sup> | 0/1 <sup>0</sup>       | 0/1 <sup>0</sup>       | 0/1 <sup>0</sup>       | 1/1 <sup>0</sup>       | 1/1 <sup>0</sup>       | 1/1 <sup>0</sup>       | 0/1 <sup>0</sup>    |
| Tumor cell count                                                  |         | 0/2 <sup>I,j</sup>                  | 0/1 <sup>J</sup>       | 0/1 <sup>J</sup>  | 0/1 <sup>J</sup>       | 0/1 <sup>J</sup>       | 0/1 <sup>J</sup> | 0/1 <sup>J</sup>       | 0/1 <sup>J</sup>       | 0/1 <sup>J</sup>       | 0/1 <sup>J</sup>       | 0/1 <sup>J</sup>       | 0/1 <sup>J</sup>       | 0/1 <sup>J</sup>    |
| p53                                                               |         | 0/1 <sup>D</sup>                    | 0/1 <sup>D</sup>       | 0/1 <sup>D</sup>  | 0/1 <sup>D</sup>       | 0/1 <sup>D</sup>       | 0/1 <sup>D</sup> | 0/1 <sup>D</sup>       | 0/1 <sup>D</sup>       | 0/1 <sup>D</sup>       | 0/1 <sup>D</sup>       | 0/1 <sup>D</sup>       | 0/1 <sup>D</sup>       | 0/1 <sup>D</sup>    |
| <b>Extravascular space (V<sub>e</sub>)</b>                        |         |                                     |                        |                   |                        |                        |                  |                        |                        |                        |                        |                        |                        |                     |
|                                                                   |         | Mean                                | Min                    | Max               | Median                 | Mode                   | SD               | Kurtosis               | Skewness               | Entropy                | P10                    | P25                    | P75                    | P90                 |
| HPV                                                               | All     | 0/4 <sup>B-E</sup>                  | 0/1 <sup>D</sup>       | 0/1 <sup>D</sup>  | 0/2 <sup>B,D</sup>     | 0/1 <sup>D</sup>       | 0/1 <sup>D</sup> | 0/2 <sup>B,D</sup>     | 0/2 <sup>B,D</sup>     | 0/1 <sup>D</sup>       | 0/1 <sup>D</sup>       | 0/2 <sup>B,D</sup>     | 0/2 <sup>B,D</sup>     | 0/1 <sup>D</sup>    |
|                                                                   | P16     | 0/2 <sup>B,D</sup>                  | 0/1 <sup>D</sup>       | 0/1 <sup>D</sup>  | 0/2 <sup>B,D</sup>     | 0/1 <sup>D</sup>       | 0/1 <sup>D</sup> | 0/2 <sup>B,D</sup>     | 0/2 <sup>B,D</sup>     | 0/1 <sup>D</sup>       | 0/1 <sup>D</sup>       | 0/2 <sup>B,D</sup>     | 0/2 <sup>B,D</sup>     | 0/1 <sup>D</sup>    |
|                                                                   | PCR+P16 | 0/1 <sup>E</sup>                    | -                      | -                 | -                      | -                      | -                | -                      | -                      | -                      | -                      | -                      | -                      | -                   |
|                                                                   | Other   | 0/1 <sup>C</sup>                    | -                      | -                 | -                      | -                      | -                | -                      | -                      | -                      | -                      | -                      | -                      | -                   |
| Ki-67                                                             |         | 0/3 <sup>F,I,J</sup>                | <b>1/1<sup>J</sup></b> | 0/1 <sup>J</sup>  | 0/1 <sup>J</sup>       | 0/1 <sup>J</sup>       | 0/1 <sup>J</sup> | 0/1 <sup>J</sup>       | 0/1 <sup>J</sup>       | <b>1/1<sup>J</sup></b> | 0/1 <sup>J</sup>       | 0/1 <sup>J</sup>       | 0/1 <sup>J</sup>       | 0/1 <sup>J</sup>    |
| HIF-1α                                                            |         | 1/3 <sup>D,F,K</sup>                | 0/1 <sup>D</sup>       | 0/1 <sup>D</sup>  | 0/1 <sup>D</sup>       | 0/1 <sup>D</sup>       | 0/1 <sup>D</sup> | 0/1 <sup>D</sup>       | 0/1 <sup>D</sup>       | 0/1 <sup>D</sup>       | 0/1 <sup>D</sup>       | 0/1 <sup>D</sup>       | 0/1 <sup>D</sup>       | 0/1 <sup>D</sup>    |
| EGFR                                                              |         | 1/4 <sup>B,D,F,Q</sup>              | 0/1 <sup>D</sup>       | 0/1 <sup>D</sup>  | 0/2 <sup>B,D</sup>     | 0/1 <sup>D</sup>       | 0/1 <sup>D</sup> | 0/2 <sup>B,D</sup>     | 0/2 <sup>B,D</sup>     | 0/1 <sup>D</sup>       | 0/1 <sup>D†</sup>      | 0/2 <sup>B,D</sup>     | 0/2 <sup>B,D</sup>     | 0/1 <sup>D</sup>    |
| VGEF                                                              |         | 0/2 <sup>D,K</sup>                  | 0/1 <sup>D</sup>       | 0/1 <sup>D</sup>  | 0/1 <sup>D</sup>       | 0/1 <sup>D</sup>       | 0/1 <sup>D</sup> | 0/1 <sup>D</sup>       | 0/1 <sup>D</sup>       | 0/1 <sup>D</sup>       | 0/1 <sup>D</sup>       | 0/1 <sup>D</sup>       | 0/1 <sup>D</sup>       | 0/1 <sup>D</sup>    |
| MVD                                                               | All     | 0/4 <sup>G*,i,k,o</sup>             | 0/1 <sup>0</sup>       | 0/1 <sup>0</sup>  | 0/1 <sup>0</sup>       | 0/1 <sup>0</sup>       | 0/1 <sup>0</sup> | 0/1 <sup>0</sup>       | 0/1 <sup>0</sup>       | 0/1 <sup>0</sup>       | 0/1 <sup>0</sup>       | 0/1 <sup>0</sup>       | 0/1 <sup>0</sup>       | 0/1 <sup>0</sup>    |
|                                                                   | CD31    | 0/1 <sup>I</sup>                    | -                      | -                 | -                      | -                      | -                | -                      | -                      | -                      | -                      | -                      | -                      | -                   |
|                                                                   | CD34    | 0/2 <sup>G*,k</sup>                 | -                      | -                 | -                      | -                      | -                | -                      | -                      | -                      | -                      | -                      | -                      | -                   |
|                                                                   | CD105   | 0/2 <sup>G*,o</sup>                 | 0/1 <sup>0</sup>       | 0/1 <sup>0</sup>  | 0/1 <sup>0</sup>       | 0/1 <sup>0</sup>       | 0/1 <sup>0</sup> | 0/1 <sup>0</sup>       | 0/1 <sup>0</sup>       | 0/1 <sup>0</sup>       | 0/1 <sup>0</sup>       | 0/1 <sup>0</sup>       | 0/1 <sup>0</sup>       | 0/1 <sup>0</sup>    |
| Tumor cell count                                                  |         | 0/2 <sup>I,j</sup>                  | 0/1 <sup>J</sup>       | 0/1 <sup>J</sup>  | 0/1 <sup>J</sup>       | 0/1 <sup>J</sup>       | 0/1 <sup>J</sup> | 0/1 <sup>J</sup>       | 0/1 <sup>J</sup>       | <b>1/1<sup>J</sup></b> | 0/1 <sup>J</sup>       | 0/1 <sup>J</sup>       | 0/1 <sup>J</sup>       | 0/1 <sup>J</sup>    |
| p53                                                               |         | 0/1 <sup>D</sup>                    | 0/1 <sup>D</sup>       | 0/1 <sup>D†</sup> | 0/1 <sup>D</sup>       | 0/1 <sup>D</sup>       | 0/1 <sup>D</sup> | 0/1 <sup>D</sup>       | 0/1 <sup>D</sup>       | 0/1 <sup>D</sup>       | 0/1 <sup>D</sup>       | 0/1 <sup>D</sup>       | 0/1 <sup>D</sup>       | 0/1 <sup>D</sup>    |
| <b>V<sub>p</sub> DCE-AUC QTM Time-signal intensity curve(TIC)</b> |         |                                     |                        |                   |                        |                        |                  |                        |                        |                        |                        |                        |                        |                     |
|                                                                   |         | Mean                                | 60 sec                 | 90 sec            | TBF                    | u                      | D                | RE                     | ME                     | MRE                    | TTP                    | WIR                    | WOR                    | AUC                 |
| HPV                                                               | All     | 0/1 <sup>C</sup>                    | 0/1 <sup>C</sup>       | 0/1 <sup>E</sup>  | -                      | -                      | -                | -                      | -                      | -                      | -                      | -                      | -                      | -                   |
|                                                                   | PCR+P16 | -                                   | -                      | 0/1 <sup>E</sup>  | -                      | -                      | -                | -                      | -                      | -                      | -                      | -                      | -                      | -                   |
|                                                                   | Other   | 0/1 <sup>C</sup>                    | 0/1 <sup>C</sup>       | -                 | -                      | -                      | -                | -                      | -                      | -                      | -                      | -                      | -                      | -                   |
| Ki-67                                                             |         | -                                   | -                      | -                 | 0/1 <sup>F</sup>       | <b>1/1<sup>F</sup></b> | 0/1 <sup>F</sup> | -                      | -                      | -                      | -                      | -                      | -                      | -                   |
| HIF-1α                                                            |         | 0/1 <sup>K</sup>                    | -                      | -                 | <b>1/1<sup>F</sup></b> | <b>1/1<sup>F</sup></b> | 0/1 <sup>F</sup> | <b>1/1<sup>L</sup></b> | <b>1/1<sup>L</sup></b> | <b>1/1<sup>L</sup></b> | 0/1 <sup>L</sup>       | 0/1 <sup>L</sup>       | 0/1 <sup>L</sup>       | 0/1 <sup>L</sup>    |
| EGFR                                                              |         | -                                   | -                      | -                 | 0/1 <sup>F</sup>       | 0/1 <sup>F</sup>       | 0/1 <sup>F</sup> | -                      | -                      | -                      | -                      | -                      | -                      | -                   |
| VGEF                                                              |         | <b>1/1<sup>K</sup></b>              | -                      | -                 | -                      | -                      | -                | -                      | -                      | -                      | -                      | -                      | -                      | -                   |
| MVD                                                               | All     | 0/1 <sup>K</sup>                    | -                      | -                 | -                      | -                      | -                | -                      | -                      | -                      | -                      | -                      | -                      | 0/2 <sup>G*,i</sup> |
|                                                                   | CD31    | -                                   | -                      | -                 | -                      | -                      | -                | -                      | -                      | -                      | -                      | -                      | -                      | 0/1 <sup>I</sup>    |
|                                                                   | CD34    | 0/1 <sup>K</sup>                    | -                      | -                 | -                      | -                      | -                | -                      | -                      | -                      | -                      | -                      | -                      | 0/1 <sup>G</sup>    |

| CD105 | -       | -                          | -                | -                        | -                | -                | -                            | -                      | -                | -                      | -                | -                | 0/1 <sup>G</sup>       |
|-------|---------|----------------------------|------------------|--------------------------|------------------|------------------|------------------------------|------------------------|------------------|------------------------|------------------|------------------|------------------------|
|       |         | 2 Compartment model (2CXM) |                  |                          |                  |                  | Arterial spin labeling (ASL) |                        |                  |                        |                  |                  |                        |
|       |         | Fb                         | PS               | Vb                       | Ve               | MTT              | Mean                         | SD                     | CV               | Skewness               | Kurtosis         | TBF P5           | TBF P95                |
| HPV   | All     | -                          | -                | -                        | -                | -                | 0/1 <sup>A</sup>             | <b>1/1<sup>A</sup></b> | 0/1 <sup>A</sup> | 0/1 <sup>A</sup>       | 0/1 <sup>A</sup> | 0/1 <sup>A</sup> | <b>1/1<sup>A</sup></b> |
|       | PCR+P16 | -                          | -                | -                        | -                | -                | 0/1 <sup>A</sup>             | <b>1/1<sup>A</sup></b> | 0/1 <sup>A</sup> | 0/1 <sup>A</sup>       | 0/1 <sup>A</sup> | 0/1 <sup>A</sup> | <b>1/1<sup>A</sup></b> |
|       | Other   | -                          | -                | -                        | -                | -                | -                            | -                      | -                | -                      | -                | -                | -                      |
| VGEF  |         | <b>1/1<sup>M</sup></b>     | 0/1 <sup>M</sup> | 0/1 <sup>M</sup>         | 0/1 <sup>M</sup> | 0/1 <sup>M</sup> | -                            | -                      | -                | -                      | -                | -                | -                      |
|       |         | Contrast Index (CI)        |                  |                          |                  |                  |                              |                        |                  |                        |                  |                  |                        |
|       |         | CI max                     |                  | CI gain max              |                  | CI-peak          |                              | T-max                  |                  | CI-gain/CI-max ratio   |                  |                  |                        |
| VGEF  |         | 0/1 <sup>N</sup>           |                  | 0/1 <sup>N</sup>         |                  | 0/1 <sup>N</sup> |                              | 0/1 <sup>N</sup>       |                  | -                      |                  |                  |                        |
| MVD   | All     | 0/2 <sup>N,P</sup>         |                  | <b>2/2<sup>N,P</sup></b> |                  | 0/1 <sup>N</sup> |                              | <b>1/1<sup>N</sup></b> |                  | <b>1/1<sup>P</sup></b> |                  |                  |                        |
|       | CD31    | 0/1 <sup>N</sup>           |                  | <b>1/1<sup>N</sup></b>   |                  | 0/1 <sup>N</sup> |                              | <b>1/1<sup>N</sup></b> |                  | -                      |                  |                  |                        |
|       | CD34    | 0/1 <sup>P</sup>           |                  | <b>1/1<sup>P</sup></b>   |                  | -                |                              | -                      |                  | <b>1/1<sup>P</sup></b> |                  |                  |                        |

Table shows the proportion of studies (number significant / number not significant) reporting significant associations between different functional MRI parameters and biological features as indicated. Proportions of more than half testing the indicated association are highlighted in bold.

Abbreviations = Min: minimum; max: maximum; SD: Standard deviation; P10,P25,P75,P90: percentile 10, 25, 75, 90; Vp: fractional plasma volume; QTM: Quantitative transport mapping; RE: relative enhancement; ME: maximum enhancement; MRE: maximum relative enhancement; TTP: time to peak; WIR: wash-in rate; WOR: wash-out rate; AUC: Area under the curve; Fb: perfusion; PS: Capillary permeability, Vb: blood volume; Ve: Extravascular extracellular space volume; MTT: whole blood mean transit time; CV: Coefficient of variance, TBF: tumor blood flow.

Notes: \*Significant for P16 positive subgroup analyses; †significant in P16 negative subgroup analyses; ‡study tested two MVD IHC markers.

- |                                              |                                              |
|----------------------------------------------|----------------------------------------------|
| a. Ahn, 2021 (article reference: [25])       | j. Surov, 2018 (article reference: [64])     |
| b. Choi, 2016 (article reference: [30])      | k. Hu, 2018 (article reference: [39])        |
| c. Han, 2018 (article reference: [38])       | l. Lui, 2021 (article reference: [42])       |
| d. Meyer, 2019 (article reference: [48])     | m. Donaldson, 2011 (article reference: [33]) |
| e. Piludu, 2021 (article reference: [54])    | n. Tekiki, 2021 (article reference: [66])    |
| f. Huang, 2021 (article reference: [40])     | o. Meyer, 2019 (article reference: [50])     |
| g. Karabay, 2022 (article reference: [41])   | p. Unetsubo, 2009 (article reference: [68])  |
| h. Rasmussen, 2020 (article reference: [60]) | q. Chen Y., 2023 (article reference: [75])   |
| i. Surov, 2017 (article reference: [62])     |                                              |

#### APPENDIX S4 – SIGNIFICANCE OVERVIEW FOR BIOLOGICAL FEATURES WITH LESS THAN FOUR REPORTING SOURCES

Tables depicting the frequency of reported significant results for each individual MRI parameter out of the total number of researched studies, displayed as  $\text{nr. Significant}^{\text{significant references}} / \text{nr. Total}^{\text{Other reporting references}}$ . If the percentage of significant studies exceeds 50%, the corresponding numbers are presented in bold font. The tables are sorted by MRI sequence technique: (A4.1) Diffusion parameters (including all IVIM and DKI parameters), (A4.2) Perfusion parameters (including pharmacokinetic models, time-signal intensity curve (TIC), and arterial spin labeling (ASL) parameters), and (A4.3) stand-alone conventional t1w and t2w imaging parameters.

##### A4.1 STAND-ALONE CONVENTIONAL T1W AND T2W IMAGING PARAMETERS

| Biological factor | Conventional T1W or T2W (not specified) |                  |                               |
|-------------------|-----------------------------------------|------------------|-------------------------------|
|                   | Volume                                  | Diameter         | Primary tumor necrosis on MRI |
| PD-L1             | -                                       | -                | <b>1/1<sup>M</sup></b>        |
| EBV               | 0/1 <sup>N</sup>                        | 0/1 <sup>N</sup> | -                             |

Abbreviations = Min: minimum; max: maximum; SD: Standard deviation; P10,P25,P75,P90: percentile 10, 25, 75, 90

##### A4.2 DIFFUSION

| Biological factor |         | ADC                            |                                |                    |                        |                        |                  |                  |                  |                  |                  |                        |                  |                        |
|-------------------|---------|--------------------------------|--------------------------------|--------------------|------------------------|------------------------|------------------|------------------|------------------|------------------|------------------|------------------------|------------------|------------------------|
|                   |         | Mean                           | Min                            | Max                | Median                 | Mode                   | SD               | Kurtosis         | Skewness         | Entropy          | P10              | P25                    | P75              | P90                    |
| Nuclei Area       | Total   | <b>2/2<sup>A,B</sup></b>       | 1 <sup>B</sup> /2 <sup>A</sup> | 0/2 <sup>A,B</sup> | <b>1/1<sup>B</sup></b> | 0/1 <sup>B</sup>       | 0/1 <sup>B</sup> | 0/1 <sup>B</sup> | 0/1 <sup>B</sup> | 0/1 <sup>B</sup> | 0/1 <sup>B</sup> | <b>1/1<sup>B</sup></b> | 0/1 <sup>B</sup> | <b>1/1<sup>B</sup></b> |
|                   | Average | 0/2 <sup>A,B</sup>             | 0/2 <sup>A,B</sup>             | 0/2 <sup>A,B</sup> | 0/1 <sup>B</sup>       | 0/1 <sup>B</sup>       | 0/1 <sup>B</sup> | 0/1 <sup>B</sup> | 0/1 <sup>B</sup> | 0/1 <sup>B</sup> | 0/1 <sup>B</sup> | 0/1 <sup>B</sup>       | 0/1 <sup>B</sup> | 0/1 <sup>B</sup>       |
| HER2              |         | 0/2 <sup>C,D</sup>             | 0/1 <sup>C</sup>               | 0/1 <sup>C</sup>   | 0/1 <sup>C</sup>       | <b>1/1<sup>C</sup></b> | -                | 0/1 <sup>C</sup>       | 0/1 <sup>C</sup> | 0/1 <sup>C</sup>       |
| CD3 cell count    |         | 0/1 <sup>E</sup>               | -                              | -                  | -                      | -                      | -                | -                | -                | -                | -                | -                      | -                | -                      |
| CAIX              |         | 0/1 <sup>F</sup>               | -                              | -                  | -                      | -                      | -                | -                | -                | -                | -                | -                      | -                | -                      |
| PD-L1             |         | <b>1/1<sup>F</sup></b>         | -                              | -                  | -                      | -                      | -                | -                | -                | -                | -                | -                      | -                | -                      |
| Bcl-2             |         | 1 <sup>F</sup> /2 <sup>D</sup> | -                              | -                  | -                      | -                      | -                | -                | -                | -                | -                | -                      | -                | -                      |
| GLUT-1            |         | 0/1 <sup>F</sup>               | -                              | -                  | -                      | -                      | -                | -                | -                | -                | -                | -                      | -                | -                      |
| IL6/ IL8/ IL10    |         | 0/1 <sup>D</sup>               | -                              | -                  | -                      | -                      | -                | -                | -                | -                | -                | -                      | -                | -                      |
| Bak / Bax         |         | 0/1 <sup>D</sup>               | -                              | -                  | -                      | -                      | -                | -                | -                | -                | -                | -                      | -                | -                      |

|                    |                    |                  |                  |                  |                  |                  |                  |                  |                  |                  |                  |                  |                  |
|--------------------|--------------------|------------------|------------------|------------------|------------------|------------------|------------------|------------------|------------------|------------------|------------------|------------------|------------------|
| COX-2              | 0/1 <sup>P</sup>   | -                | -                | -                | -                | -                | -                | -                | -                | -                | -                | -                | -                |
| HER2               | 0/1 <sup>C,D</sup> | 0/1 <sup>C</sup> | 0/1 <sup>C</sup> | 0/1 <sup>C</sup> | 1/1 <sup>C</sup> | 0/1 <sup>C</sup> |
| Tumor stroma ratio | 0/1 <sup>O</sup>   | -                | -                | -                | -                | -                | -                | -                | -                | -                | -                | -                | -                |

Abbreviations = Min: minimum; max: maximum; SD: Standard deviation; P10,P25,P75,P90: percentile 10, 25, 75, 90.

#### A4.3 PERFUSION PARAMETERS

|                                |         | Volume transfer constant (K <sup>trans</sup> ) |                  |                  |                  |                  |                  |                  |                  |                  |                  |                  |                  |                  |
|--------------------------------|---------|------------------------------------------------|------------------|------------------|------------------|------------------|------------------|------------------|------------------|------------------|------------------|------------------|------------------|------------------|
| Biological factor              |         | Mean                                           | Min              | Max              | Median           | Mode             | SD               | Kurtosis         | Skewness         | Entropy          | P10              | P25              | P75              | P90              |
| Nuclei Area                    | Total   | 0/1 <sup>G</sup>                               | 0/1 <sup>G</sup> | 0/1 <sup>G</sup> | 0/1 <sup>G</sup> | 0/1 <sup>G</sup> | 0/1 <sup>G</sup> | 0/1 <sup>G</sup> | 0/1 <sup>G</sup> | 0/1 <sup>G</sup> | 0/1 <sup>G</sup> | 0/1 <sup>G</sup> | 0/1 <sup>G</sup> | 0/1 <sup>G</sup> |
|                                | Average | 0/1 <sup>G</sup>                               | 1/1 <sup>G</sup> | 0/1 <sup>G</sup> |
| CAIX                           |         | 0/2 <sup>F,H</sup>                             | -                | -                | -                | -                | -                | -                | -                | -                | -                | -                | -                | -                |
| PD-L1                          |         | 0/1 <sup>F</sup>                               | -                | -                | -                | -                | -                | -                | -                | -                | -                | -                | -                | -                |
| Blc-2                          |         | 0/1 <sup>F</sup>                               | -                | -                | -                | -                | -                | -                | -                | -                | -                | -                | -                | -                |
| GLUT-1                         |         | 0/1 <sup>F</sup>                               | -                | -                | -                | -                | -                | -                | -                | -                | -                | -                | -                | -                |
| EBV                            |         | 0/1 <sup>I</sup>                               | -                | -                | -                | -                | -                | -                | -                | -                | -                | -                | -                | -                |
| Tumor stroma ratio             |         | 0/1 <sup>P</sup>                               | 0/1 <sup>P</sup> | 0/1 <sup>P</sup> | 0/1 <sup>P</sup> | 0/1 <sup>P</sup> | -                | 0/1 <sup>P</sup> | 0/1 <sup>P</sup> | 1/1 <sup>P</sup> | 0/1 <sup>P</sup> | 0/1 <sup>P</sup> | 0/1 <sup>P</sup> | 0/1 <sup>P</sup> |
| Tumor infiltrating lymphocytes |         | 0/1 <sup>P</sup>                               | 0/1 <sup>P</sup> | 0/1 <sup>P</sup> | 0/1 <sup>P</sup> | 0/1 <sup>P</sup> | -                | 0/1 <sup>P</sup> |
|                                |         | Rate constant (K <sub>ep</sub> )               |                  |                  |                  |                  |                  |                  |                  |                  |                  |                  |                  |                  |
|                                |         | Mean                                           | Min              | Max              | Median           | Mode             | SD               | Kurtosis         | Skewness         | Entropy          | P10              | P25              | P75              | P90              |
| Nuclei Area                    | Total   | 0/1 <sup>G</sup>                               | 0/1 <sup>G</sup> | 0/1 <sup>G</sup> | 0/1 <sup>G</sup> | 0/1 <sup>G</sup> | 0/1 <sup>G</sup> | 0/1 <sup>G</sup> | 0/1 <sup>G</sup> | 0/1 <sup>G</sup> | 0/1 <sup>G</sup> | 0/1 <sup>G</sup> | 0/1 <sup>G</sup> | 0/1 <sup>G</sup> |
|                                | Average | 0/1 <sup>G</sup>                               | 0/1 <sup>G</sup> | 0/1 <sup>G</sup> | 0/1 <sup>G</sup> | 0/1 <sup>G</sup> | 0/1 <sup>G</sup> | 0/1 <sup>G</sup> | 0/1 <sup>G</sup> | 0/1 <sup>G</sup> | 0/1 <sup>G</sup> | 0/1 <sup>G</sup> | 0/1 <sup>G</sup> | 0/1 <sup>G</sup> |
| CAIX                           |         | 0/1 <sup>H</sup>                               | -                | -                | -                | -                | -                | -                | -                | -                | -                | -                | -                | -                |
| EBV                            |         | 1/1 <sup>I</sup>                               | -                | -                | -                | -                | -                | -                | -                | -                | -                | -                | -                | -                |
| Tumor stroma ratio             |         | 0/1 <sup>P</sup>                               | 0/1 <sup>P</sup> | 0/1 <sup>P</sup> | 0/1 <sup>P</sup> | 0/1 <sup>P</sup> | -                | 0/1 <sup>P</sup> |
|                                |         | Extravascular space (V <sub>e</sub> )          |                  |                  |                  |                  |                  |                  |                  |                  |                  |                  |                  |                  |
|                                |         | Mean                                           | Min              | Max              | Median           | Mode             | SD               | Kurtosis         | Skewness         | Entropy          | P10              | P25              | P75              | P90              |
| Nuclei Area                    | Total   | 0/1 <sup>G</sup>                               | 0/1 <sup>G</sup> | 1/1 <sup>G</sup> | 0/1 <sup>G</sup> | 1/1 <sup>G</sup> | 0/1 <sup>G</sup> | 0/1 <sup>G</sup> | 0/1 <sup>G</sup> | 0/1 <sup>G</sup> |
|                                | Average | 0/1 <sup>G</sup>                               | 0/1 <sup>G</sup> | 0/1 <sup>G</sup> | 0/1 <sup>G</sup> | 0/1 <sup>G</sup> | 0/1 <sup>G</sup> | 0/1 <sup>G</sup> | 0/1 <sup>G</sup> | 0/1 <sup>G</sup> | 0/1 <sup>G</sup> | 0/1 <sup>G</sup> | 0/1 <sup>G</sup> | 0/1 <sup>G</sup> |
| CAIX                           |         | 0/1 <sup>H</sup>                               | -                | -                | -                | -                | -                | -                | -                | -                | -                | -                | -                | -                |
| EBV                            |         | 1/1 <sup>I</sup>                               | -                | -                | -                | -                | -                | -                | -                | -                | -                | -                | -                | -                |
| Tumor stroma ratio             |         | 0/1 <sup>P</sup>                               | 0/1 <sup>P</sup> | 0/1 <sup>P</sup> | 0/1 <sup>P</sup> | 0/1 <sup>P</sup> | -                | 0/1 <sup>P</sup> | 1/1 <sup>P</sup> | 0/1 <sup>P</sup> | 0/1 <sup>P</sup> | 0/1 <sup>P</sup> | 1/1 <sup>P</sup> | 1/1 <sup>P</sup> |

|       | Fractional plasma volume (V <sub>p</sub> ) |     |                          |        |                        |    |                  |          |                        |     |     |     |     |
|-------|--------------------------------------------|-----|--------------------------|--------|------------------------|----|------------------|----------|------------------------|-----|-----|-----|-----|
|       | Mean                                       | Min | Max                      | Median | Mode                   | SD | Kurtosis         | Skewness | Entropy                | P10 | P25 | P75 | P90 |
| EBV   | 0/1 <sup>i</sup>                           | -   | -                        | -      | -                      | -  | -                | -        | -                      | -   | -   | -   | -   |
|       | Contrast Index (CI)                        |     |                          |        |                        |    |                  |          |                        |     |     |     |     |
|       | CI max                                     |     | CI gain max              |        | CI-peak                |    | T-max            |          | CI-gain/CI-max ratio   |     |     |     |     |
| PD-L1 | <b>1/1<sup>j</sup></b>                     |     | <b>1/1<sup>j</sup></b>   |        | <b>1/1<sup>j</sup></b> |    | 0/1 <sup>j</sup> |          | -                      |     |     |     |     |
| PCNA  | 1 <sup>L</sup> /2 <sup>K</sup>             |     | <b>2/2<sup>K,L</sup></b> |        | -                      |    | -                |          | <b>1/1<sup>K</sup></b> |     |     |     |     |

Abbreviations = Min: minimum; max: maximum; SD: Standard deviation; P10,P25,P75,P90: percentile 10, 25, 75, 90.

Notes: <sup>†</sup>significant in P16 negative subgroup analyses. Abbreviations = SD: standard deviation; P10/25/75/90: percentile

- |                                                                                                                                                                                                                                                                                                                                                                                                                                                               |                                                                                                                                                                                                                                                                                                                                                                                                                                                                                  |
|---------------------------------------------------------------------------------------------------------------------------------------------------------------------------------------------------------------------------------------------------------------------------------------------------------------------------------------------------------------------------------------------------------------------------------------------------------------|----------------------------------------------------------------------------------------------------------------------------------------------------------------------------------------------------------------------------------------------------------------------------------------------------------------------------------------------------------------------------------------------------------------------------------------------------------------------------------|
| <ul style="list-style-type: none"> <li>a. Surov, 2016 (article reference: [61])</li> <li>b. Surov, 2018 (article reference: [63])</li> <li>c. Meyer, 2018 (article reference: [47])</li> <li>d. Tse, 2010 (article reference: [67])</li> <li>e. Swartz, 2018 (article reference: [65])</li> <li>f. Rasmussen, 2020 (article reference: [60])</li> <li>g. Surov, 2018 (article reference: [64])</li> <li>h. Newbold, 2009 (article reference: [80])</li> </ul> | <ul style="list-style-type: none"> <li>i. Sriyook, 2021 (article reference: [78])</li> <li>j. Tekiki, 2021 (article reference: [66])</li> <li>k. Unetsubo, 2009 (article reference: [68])</li> <li>l. Konouchi, 2003 (article reference: [79])</li> <li>m. Chen T., 2015 (article reference: [31])</li> <li>n. Samolyk-Kogaczewska, 2020 (article reference: [56])</li> <li>o. Choi, 2017 (article reference: [81])</li> <li>p. Meyer, 2021 (article reference: [82])</li> </ul> |
|---------------------------------------------------------------------------------------------------------------------------------------------------------------------------------------------------------------------------------------------------------------------------------------------------------------------------------------------------------------------------------------------------------------------------------------------------------------|----------------------------------------------------------------------------------------------------------------------------------------------------------------------------------------------------------------------------------------------------------------------------------------------------------------------------------------------------------------------------------------------------------------------------------------------------------------------------------|
